# Supplementary material
Source: PubMed Central journal article supplement (PMC4276458)

**FIGURE EA3.1.** T statistic values of the fitted logistic regression coefficients at each  $\log_{10}(a)$  for the ipsilateral lung, esophagus, heart, no fly zone, proximal bronchial tree, and bilateral lung dose in comparison to grade 2 or greater pulmonary toxicity. The red dashed lines show the t values corresponding to a p-value of 0.05. The sign of the t-statistic indicates the direction of the model fit (i.e. correlated or anti-correlated).

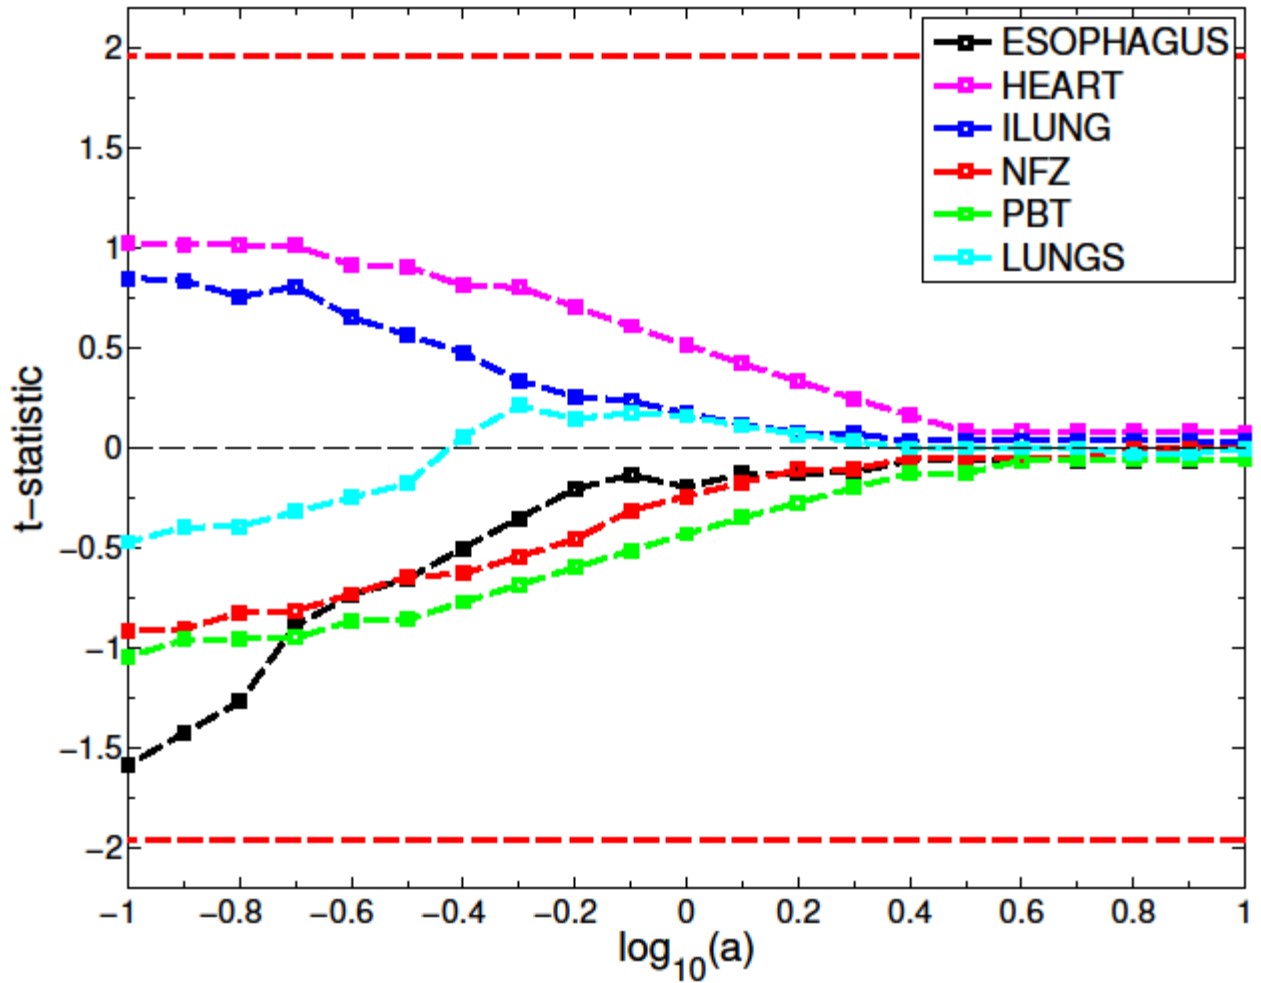

Supplement: NIHMS622636-supplement-3.pdf [file NIHMS622636-supplement-3.pdf]
